# Supplementary material for: Diel patterns in swimming behavior of a vertically migrating deepwater shark, the bluntnose sixgill (Hexanchus griseus)
Source: PubMed Central journal article supplement (PMC6980647; doi:10.1371/journal.pone.0228253), 2020-01-24
Supplement: pone.0228253.s004.pdf [file pone.0228253.s004.pdf]

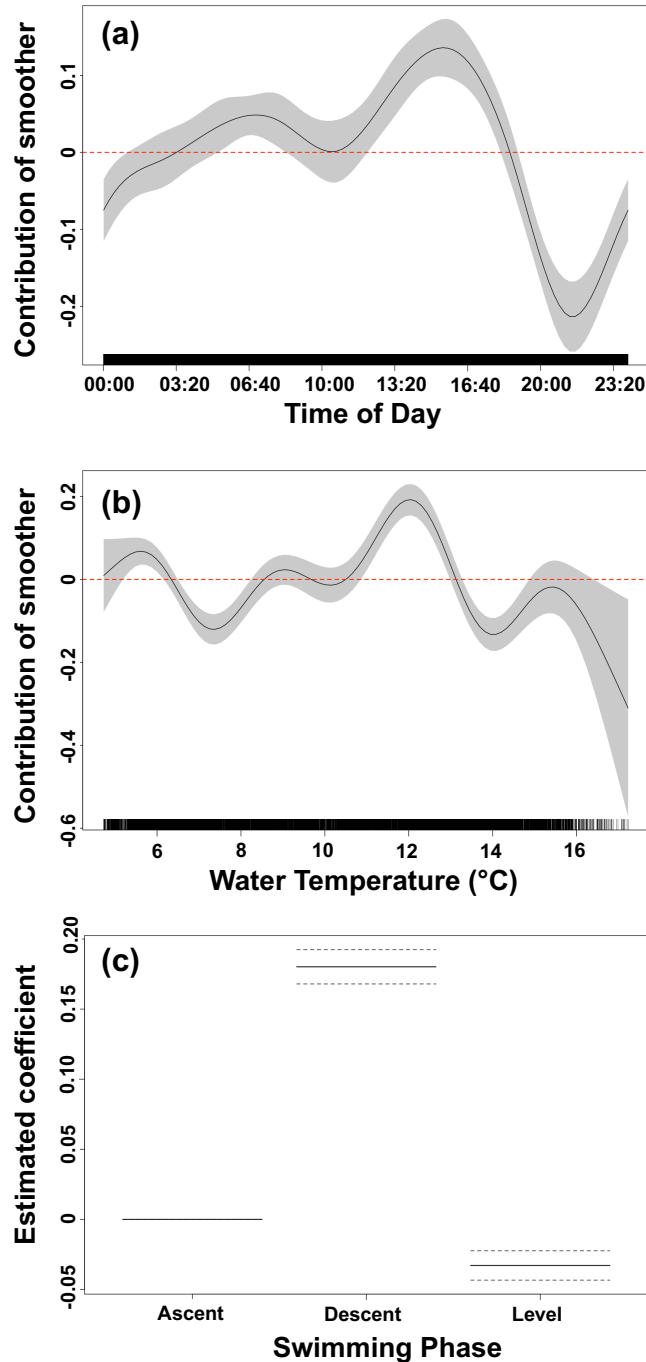

**S4 Fig. Response curves and partial coefficients from the generalized additive mixed model including swimming phase, time of day, and water temperature.** (a-b) Estimated response curves (black solid line) of component smooth functions on overall dynamic body acceleration (ODBA). Shaded areas represent 95% confidence limits of uncertainty in the centered smooth. Vertical axes are partial responses (estimated, centered smooth functions) on the scale of the linear predictor. Ticks on x-axis denote values for which there are data. Positive values on y-axis (above red dashed line) indicate increased ODBA by sixgill sharks. (c) Estimated partial coefficients for the parametric term swimming phase on ODBA from the best-fit model. Base level of ascent is centered and dashed lines represent 95% confidence limits.
