# Supplementary material for: Diel patterns in swimming behavior of a vertically migrating deepwater shark, the bluntnose sixgill (Hexanchus griseus)
Source: PubMed Central journal article supplement (PMC6980647; doi:10.1371/journal.pone.0228253), 2020-01-24
Supplement: pone.0228253.s005.pdf [file pone.0228253.s005.pdf]

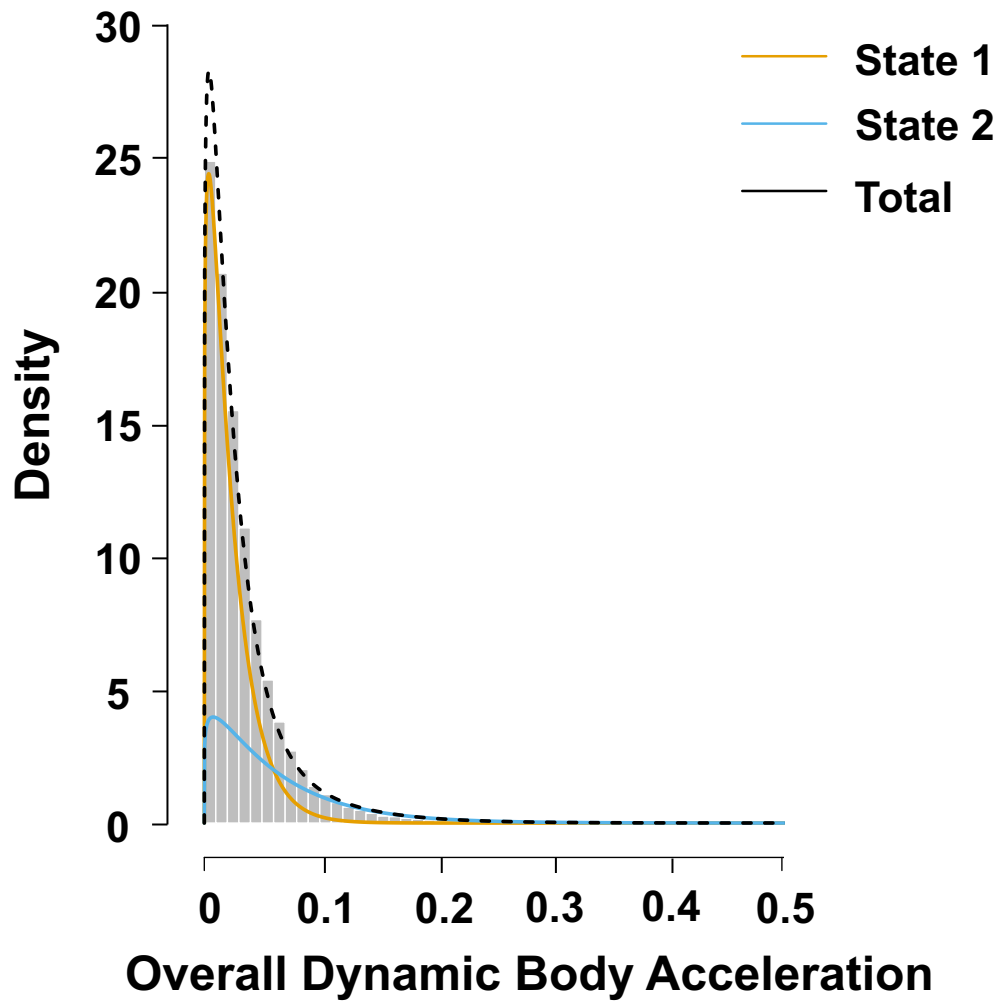

**S5 Fig. State-dependent densities of overall dynamic body acceleration (ODBA) for sixgill sharks.** Densities are weighted by the frequency of observations that correspond to each state. State 1 corresponds to relatively low levels of ODBA, while state 2 represents overall higher ODBA levels. The marginal density is the sum of the weighted-state dependent densities. ODBA values greater than 0.5 were truncated for clearer illustration and higher values were observed.
