# Supplementary material for: Diel patterns in swimming behavior of a vertically migrating deepwater shark, the bluntnose sixgill (Hexanchus griseus)
Source: PubMed Central journal article supplement (PMC6980647; doi:10.1371/journal.pone.0228253), 2020-01-24
Supplement: pone.0228253.s007.pdf [file pone.0228253.s007.pdf]

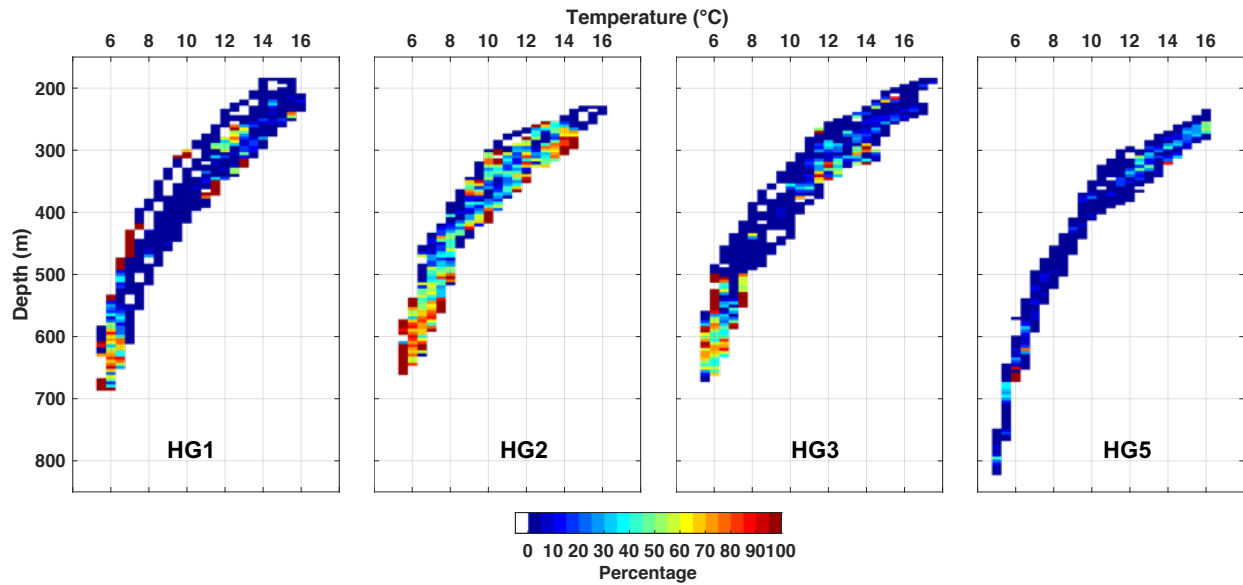

**S7 Fig. Activity of sixgill sharks along a vertical profile of depth and ambient water temperature.** Each grid cell ( $0.5 \text{ m} \times 0.5 \text{ }^\circ\text{C}$ ) is color-coded by the percentage of observations corresponding to the high-activity state (state 2) from the decoded state sequence derived from the best-fit hidden Markov model.
