# Supplementary material for: Diel patterns in swimming behavior of a vertically migrating deepwater shark, the bluntnose sixgill (Hexanchus griseus)
Source: PubMed Central journal article supplement (PMC6980647; doi:10.1371/journal.pone.0228253), 2020-01-24
Supplement: pone.0228253.s010.pdf [file pone.0228253.s010.pdf]

**S1 Table. Results of Kruskal-Wallis test examining the influence of diel depth phase on vertical displacement rate.** A Dunn-Šidák correction was used for multiple comparisons due to unequal sample size among phases. Median values reported include interquartile range. Diel depth phases without a shared letter were significantly different.

| <b>Shark ID</b> | <b>Shallow Night ROM (m min<sup>-1</sup>)</b> | <b>Deep Day ROM (m min<sup>-1</sup>)</b> | <b>Dawn Descent ROM (m min<sup>-1</sup>)</b> | <b>Dusk Ascent ROM (m min<sup>-1</sup>)</b> | <b>chi-square</b> | <b><i>P</i></b> |
|-----------------|-----------------------------------------------|------------------------------------------|----------------------------------------------|---------------------------------------------|-------------------|-----------------|
| HG1             | 1.7 (0.8-3.0) <sup>a</sup>                    | 1.2 (0.5-2.6) <sup>b</sup>               | 1.2 (0.5-3.4) <sup>b</sup>                   | 3.5 (1.8-6.2) <sup>c</sup>                  | 271.0556          | <0.0001         |
| HG2             | 2.6 (1.2-4.5) <sup>a</sup>                    | 2.0 (0.9-3.4) <sup>b</sup>               | 4.1 (2.1-6.1) <sup>c</sup>                   | 2.0 (1.0-3.5) <sup>b</sup>                  | 167.3283          | <0.0001         |
| HG3             | 1.9 (0.9-3.4) <sup>a</sup>                    | 1.2 (0.5-2.3) <sup>b</sup>               | 5.3 (3.3-7.4) <sup>c</sup>                   | 4.0 (2.1-7.0) <sup>d</sup>                  | 817.0743          | <0.0001         |
| HG4             | 3.2 (1.2-6.6) <sup>a</sup>                    | 1.7 (0.7-3.5) <sup>b</sup>               | 7.1 (4.2-9.7) <sup>c</sup>                   | 4.7 (2.2-7.0) <sup>d</sup>                  | 412.4358          | <0.0001         |
| HG5             | 2.7 (1.5-4.0) <sup>a</sup>                    | 2.2 (1.2-3.5) <sup>b</sup>               | 3.4 (1.8-4.7) <sup>c</sup>                   | 3.5 (2.6-4.5) <sup>c</sup>                  | 85.7596           | <0.0001         |

ROM, rate of movement
