# Supplementary material for: Diel patterns in swimming behavior of a vertically migrating deepwater shark, the bluntnose sixgill (Hexanchus griseus)
Source: PubMed Central journal article supplement (PMC6980647; doi:10.1371/journal.pone.0228253), 2020-01-24
Supplement: pone.0228253.s011.pdf [file pone.0228253.s011.pdf]

**S2 Table. Results of Kruskal-Wallis test examining the influence of diel depth phase on pitch and acceleration metrics. A** Dunn-Šidák correction was used for multiple comparisons due to unequal sample size among phases. Median values reported include interquartile range. Diel depth phases without a shared letter were significantly different.

|                                 | <b>Shark ID</b> | <b>HG1</b>                      | <b>HG2</b>                        | <b>HG3</b>                         | <b>HG5</b>                         |
|---------------------------------|-----------------|---------------------------------|-----------------------------------|------------------------------------|------------------------------------|
| <b>Pitch (°)</b>                | Shallow Night   | -0.3 (-5.5 to 3.7) <sup>a</sup> | -1.5 (-8.8 to 6.8) <sup>a</sup>   | -0.8 (-5.8 to 3.8) <sup>a</sup>    | 0.6 (-7.6 to 6.4) <sup>a</sup>     |
|                                 | Deep Day        | 1.0 (-2.8 to 3.9) <sup>b</sup>  | 0.2 (-6.0 to 6.9) <sup>b</sup>    | 1.3 (-2.2 to 4.7) <sup>b</sup>     | 2.9 (-6.1 to 7.2) <sup>b</sup>     |
|                                 | Dawn Descent    | -1.5 (-6.6 to 1.2) <sup>c</sup> | -9.2 (-12.6 to -4.1) <sup>c</sup> | -11.8 (-14.8 to -8.0) <sup>c</sup> | -11.0 (-14.7 to -4.1) <sup>c</sup> |
|                                 | Dusk Ascent     | 8.2 (3.0 to 18.4) <sup>d</sup>  | 5.0 (-0.0 to 9.0) <sup>d</sup>    | 7.7 (3.7-15.3) <sup>d</sup>        | 8.6 (6.5 to 11.0) <sup>d</sup>     |
|                                 | chi-square      | 362.8813                        | 215.9827                          | 810.0148                           | 337.9918                           |
|                                 | <i>P</i>        | <0.0001                         | <0.0001                           | <0.0001                            | <0.0001                            |
| <b>Tail Beat Frequency (Hz)</b> | Shallow Night   | 0.20 (0.18-0.21) <sup>a</sup>   | 0.15 (0.13-0.16) <sup>a</sup>     | 0.21 (0.18-0.21) <sup>a</sup>      | 0.20 (0.16-0.27) <sup>a</sup>      |
|                                 | Deep Day        | 0.16 (0.15-0.18) <sup>b</sup>   | 0.13 (0.13-0.15) <sup>b</sup>     | 0.19 (0.18-0.21) <sup>b</sup>      | 0.18 (0.15-0.21) <sup>b</sup>      |
|                                 | Dawn Descent    | 0.15 (0.15-0.15) <sup>c</sup>   | 0.15 (0.13-0.16) <sup>c</sup>     | 0.24 (0.21-0.24) <sup>c</sup>      | 0.17 (0.15-0.18) <sup>c</sup>      |
|                                 | Dusk Ascent     | 0.18 (0.18-0.18) <sup>a</sup>   | 0.14 (0.13-0.15) <sup>a</sup>     | 0.18 (0.18-0.20) <sup>d</sup>      | 0.21 (0.19-0.22) <sup>a</sup>      |
|                                 | chi-square      | 998.8428                        | 281.5264                          | 625.3958                           | 161.9906                           |
|                                 | <i>P</i>        | <0.0001                         | <0.0001                           | <0.0001                            | <0.0001                            |
| <b>Tail Beat Amplitude</b>      | Shallow Night   | 0.06 (0.03-0.11) <sup>a</sup>   | 0.09 (0.07-0.12) <sup>a</sup>     | 0.05 (0.04-0.07) <sup>a</sup>      | 0.04 (0.03-0.06) <sup>a</sup>      |
|                                 | Deep Day        | 0.08 (0.06-0.10) <sup>b</sup>   | 0.11 (0.08-0.13) <sup>b</sup>     | 0.07 (0.06-0.09) <sup>b</sup>      | 0.04 (0.03-0.06) <sup>a</sup>      |
|                                 | Dawn Descent    | 0.13 (0.11-0.16) <sup>c</sup>   | 0.12 (0.08-0.15) <sup>c</sup>     | 0.08 (0.07-0.11) <sup>c</sup>      | 0.08 (0.05-0.10) <sup>b</sup>      |
|                                 | Dusk Ascent     | 0.07 (0.05-0.09) <sup>a</sup>   | 0.08 (0.07-0.10) <sup>d</sup>     | 0.05 (0.03-0.09) <sup>a</sup>      | 0.03 (0.02-0.04) <sup>c</sup>      |
|                                 | chi-square      | 741.6099                        | 172.6446                          | 704.4636                           | 233.1664                           |
|                                 | <i>P</i>        | <0.0001                         | <0.0001                           | <0.0001                            | <0.0001                            |
| <b>ODBA (m s<sup>-2</sup>)</b>  | Shallow Night   | 0.13 (0.10-0.20) <sup>a</sup>   | 0.19 (0.15-0.23) <sup>a</sup>     | 0.17 (0.14-0.20) <sup>a</sup>      | 0.12 (0.10-0.16) <sup>a</sup>      |
|                                 | Deep Day        | 0.18 (0.16-0.20) <sup>b</sup>   | 0.23 (0.18-0.26) <sup>b</sup>     | 0.24 (0.20-0.30) <sup>b</sup>      | 0.19 (0.14-0.22) <sup>a</sup>      |
|                                 | Dawn Descent    | 0.22 (0.20-0.27) <sup>c</sup>   | 0.22 (0.19-0.26) <sup>b</sup>     | 0.22 (0.19-0.26) <sup>c</sup>      | 0.13 (0.10-0.16) <sup>b</sup>      |
|                                 | Dusk Ascent     | 0.16 (0.14-0.20) <sup>b</sup>   | 0.20 (0.17-0.23) <sup>c</sup>     | 0.17 (0.12-0.25) <sup>d</sup>      | 0.12 (0.11-0.14) <sup>a</sup>      |
|                                 | chi-square      | 686.6868                        | 296.8927                          | 1017.232                           | 197.363                            |
|                                 | <i>P</i>        | <0.0001                         | <0.0001                           | <0.0001                            | <0.0001                            |
