# Supplementary material for: Diel patterns in swimming behavior of a vertically migrating deepwater shark, the bluntnose sixgill (Hexanchus griseus)
Source: PubMed Central journal article supplement (PMC6980647; doi:10.1371/journal.pone.0228253), 2020-01-24
Supplement: pone.0228253.s012.pdf [file pone.0228253.s012.pdf]

**S3 Table. Principal component analysis (PCA) loadings for components (1-4).** Loadings indicate the correlation between the component and each variable sub-sampled over 1-min means.

| <b>Variable</b>                | <b>PC1</b> | <b>PC2</b> | <b>PC3</b> | <b>PC4</b> |
|--------------------------------|------------|------------|------------|------------|
| Depth (m)                      | 0.513      | 0.310      | 0.536      | 0.595      |
| Water Temperature (°C)         | -0.518     | -0.217     | -0.253     | 0.788      |
| Intramuscular Temperature (°C) | -0.453     | 0.889      |            |            |
| % Oxygen Saturation            | -0.513     | -0.257     | 0.805      | -0.149     |
| Proportion Variance Explained  | 0.891      | 0.085      | 0.015      | 0.009      |
