# Supplementary material for: Diel patterns in swimming behavior of a vertically migrating deepwater shark, the bluntnose sixgill (Hexanchus griseus)
Source: PubMed Central journal article supplement (PMC6980647; doi:10.1371/journal.pone.0228253), 2020-01-24
Supplement: pone.0228253.s013.pdf [file pone.0228253.s013.pdf]

**S4 Table. Ranked generalized additive mixed models of effects on overall dynamic body acceleration.** Phase corresponds to swimming phase (ascent, descent, level). s() denotes a smooth term and t2() denotes a tensor product smooth (interaction). Values in bold indicate the best-fit model. n = 15890.

| Model                                                     | df       | logLik         | r2 (adj.)    | AIC <sub>c</sub> | ΔAIC <sub>c</sub> | w                         | %DE         |
|-----------------------------------------------------------|----------|----------------|--------------|------------------|-------------------|---------------------------|-------------|
| <b>Phase + s(Time of Day) + s(PC1)</b>                    | <b>9</b> | <b>-2428.5</b> | <b>0.206</b> | <b>4875.0</b>    | <b>0.0</b>        | <b>1.00</b>               | <b>20.7</b> |
| Phase + s(Time of Day) + s(Depth, m)                      | 9        | -2438.5        | 0.153        | 4895.0           | 20.0              | 4.50 × 10 <sup>-5</sup>   | 15.4        |
| Phase + s(Time of Day) + s(Water Temperature, °C)         | 9        | -2438.9        | 0.178        | 4895.8           | 20.8              | 2.99 × 10 <sup>-5</sup>   | 17.9        |
| Phase + s(PC1)                                            | 8        | -2441.0        | 0.178        | 4897.9           | 23.0              | 1.02 × 10 <sup>-5</sup>   | 17.8        |
| Phase + s(Water Temperature, °C)                          | 8        | -2454.7        | 0.153        | 4925.4           | 50.4              | 1.14 × 10 <sup>-11</sup>  | 15.4        |
| Phase + s(Time of Day) + s(Intramuscular Temperature, °C) | 9        | -2454.3        | 0.157        | 4926.6           | 51.6              | 6.26 × 10 <sup>-12</sup>  | 15.7        |
| Phase + t2(Time of Day × Water Temperature, °C)           | 11       | -2456.4        | 0.146        | 4934.7           | 59.8              | 1.05 × 10 <sup>-13</sup>  | 14.7        |
| Phase + t2(Time of Day × PC1)                             | 11       | -2462.0        | 0.150        | 4946.0           | 71.0              | 3.73 × 10 <sup>-16</sup>  | 15.0        |
| Phase + t2(Time of Day × Depth, m)                        | 11       | -2473.3        | 0.108        | 4968.6           | 93.6              | 4.72 × 10 <sup>-21</sup>  | 10.9        |
| Phase + t2(Time of Day × Intramuscular Temperature, °C)   | 11       | -2474.5        | 0.148        | 4971.0           | 96.0              | 1.40 × 10 <sup>-21</sup>  | 14.9        |
| Phase + t2(Time of Day × % Oxygen Saturation)             | 11       | -2475.1        | 0.106        | 4972.2           | 97.2              | 7.67 × 10 <sup>-22</sup>  | 10.6        |
| Phase + s(Time of Day) + s(% Oxygen Saturation)           | 9        | -2477.9        | 0.095        | 4973.8           | 98.9              | 3.41 × 10 <sup>-22</sup>  | 9.6         |
| Phase + s(Time of Day)                                    | 7        | -2481.2        | 0.092        | 4976.4           | 101.5             | 9.31 × 10 <sup>-23</sup>  | 9.3         |
| Phase + s(Intramuscular Temperature, °C)                  | 8        | -2482.9        | 0.122        | 4981.7           | 106.8             | 6.51 × 10 <sup>-24</sup>  | 12.3        |
| Phase + s(Depth, m)                                       | 8        | -2492.7        | 0.076        | 5001.4           | 126.4             | 3.51 × 10 <sup>-28</sup>  | 7.5         |
| Phase + s(% Oxygen Saturation)                            | 8        | -2506.1        | 0.086        | 5028.2           | 153.2             | 5.38 × 10 <sup>-34</sup>  | 8.5         |
| Phase                                                     | 6        | -2521.5        | 0.042        | 5055.0           | 180.1             | 7.87 × 10 <sup>-40</sup>  | 4.2         |
| s(Time of Day) + s(PC1)                                   | 7        | -2916.6        | 0.150        | 5847.2           | 972.3             | 7.47 × 10 <sup>-212</sup> | 15.1        |
| t2(Time of Day × Depth, m)                                | 9        | -2920.5        | 0.095        | 5859.0           | 984.1             | 2.05 × 10 <sup>-214</sup> | 9.5         |
| s(Time of Day) + s(Depth, m)                              | 7        | -2923.8        | 0.098        | 5861.7           | 986.7             | 5.50 × 10 <sup>-215</sup> | 9.9         |
| s(Time of Day) + s(Water Temperature, °C)                 | 7        | -2930.2        | 0.120        | 5874.4           | 999.4             | 9.52 × 10 <sup>-218</sup> | 12.1        |
| s(PC1)                                                    | 6        | -2934.2        | 0.118        | 5880.4           | 1005.4            | 4.70 × 10 <sup>-219</sup> | 11.8        |
| s(Time of Day) + s(Intramuscular Temperature, °C)         | 7        | -2940.8        | 0.103        | 5895.5           | 1020.6            | 2.46 × 10 <sup>-222</sup> | 10.4        |
| t2(Time of Day × Water Temperature, °C)                   | 9        | -2941.4        | 0.089        | 5900.8           | 1025.8            | 1.79 × 10 <sup>-223</sup> | 8.9         |
| s(Water Temperature, °C)                                  | 6        | -2944.9        | 0.093        | 5901.7           | 1026.8            | 1.10 × 10 <sup>-223</sup> | 9.3         |
| t2(Time of Day × % Oxygen Saturation)                     | 9        | -2942.6        | 0.054        | 5903.2           | 1028.3            | 5.21 × 10 <sup>-224</sup> | 5.4         |
| s(Time of Day)                                            | 5        | -2947.8        | 0.046        | 5905.5           | 1030.6            | 1.66 × 10 <sup>-224</sup> | 4.6         |

| <b>Model</b>                                    | <b>df</b> | <b>logLik</b> | <b>r2 (adj.)</b> | <b>AIC<sub>c</sub></b> | <b>ΔAIC<sub>c</sub></b> | <b>w</b>                | <b>%DE</b> |
|-------------------------------------------------|-----------|---------------|------------------|------------------------|-------------------------|-------------------------|------------|
| t2(Time of Day × Intramuscular Temperature, °C) | 9         | -2947.1       | 0.098            | 5912.3                 | 1037.3                  | $5.60 \times 10^{-226}$ | 9.8        |
| s(Time of Day) + s(% Oxygen Saturation)         | 7         | -2949.7       | 0.048            | 5913.4                 | 1038.4                  | $3.23 \times 10^{-226}$ | 4.8        |
| t2(Time of Day × PC1)                           | 9         | -2949.8       | 0.097            | 5917.7                 | 1042.7                  | $3.82 \times 10^{-227}$ | 9.7        |
| s(Depth, m)                                     | 6         | -2968.0       | 0.027            | 5948.1                 | 1073.1                  | $9.43 \times 10^{-234}$ | 2.6        |
| s(Intramuscular Temperature, °C)                | 6         | -2969.5       | 0.069            | 5951.1                 | 1076.1                  | $2.11 \times 10^{-234}$ | 6.9        |
| Intercept only                                  | 4         | -2976.9       |                  | 5961.8                 | 1086.9                  | $9.72 \times 10^{-237}$ |            |
| s(% Oxygen Saturation)                          | 6         | -2976.8       | 0.039            | 5965.6                 | 1090.6                  | $1.52 \times 10^{-237}$ | 3.8        |

df, degrees of freedom; logLik, maximum log-likelihood; %DE, percent deviance explained
