# Supplementary material for: Diel patterns in swimming behavior of a vertically migrating deepwater shark, the bluntnose sixgill (Hexanchus griseus)
Source: PubMed Central journal article supplement (PMC6980647; doi:10.1371/journal.pone.0228253), 2020-01-24
Supplement: pone.0228253.s014.pdf [file pone.0228253.s014.pdf]

**S5 Table. Results from the best generalized additive mixed models fitted to overall dynamic body acceleration (ODBA).** Phase corresponds to swimming phase (ascent, descent, level) and reference level is set to ascent for estimation of parametric coefficients. s() denotes a smoother term. n = 15890.

| Model and terms                                          | df | Estimate ± SE  | t-value | edf   | F-ratio | P        |
|----------------------------------------------------------|----|----------------|---------|-------|---------|----------|
| ODBA ~ Phase + s(Time of Day) + s(PC1)                   |    |                |         |       |         |          |
| Phase                                                    | 2  |                |         |       | 540.1   | < 0.0001 |
| Intercept                                                |    | -1.737 ± 0.063 | -27.477 |       |         | < 0.0001 |
| Descent                                                  |    | 0.177 ± 0.006  | 29.023  |       |         | < 0.0001 |
| Level                                                    |    | -0.032 ± 0.005 | -6.219  |       |         | < 0.0001 |
| s(Time of Day)                                           |    |                |         | 7.068 | 19.66   | < 0.0001 |
| s(PC1)                                                   |    |                |         | 8.869 | 44.06   | < 0.0001 |
| ODBA ~ Phase + s(Time of Day) + s(Depth, m)              |    |                |         |       |         |          |
| Phase                                                    | 2  |                |         |       | 542.5   | < 0.0001 |
| Intercept                                                |    | -1.735 ± 0.069 | -25.245 |       |         | < 0.0001 |
| Descent                                                  |    | 0.177 ± 0.006  | 29.064  |       |         | < 0.0001 |
| Level                                                    |    | -0.034 ± 0.005 | -6.446  |       |         | < 0.0001 |
| s(Time of Day)                                           |    |                |         | 6.093 | 9.329   | < 0.0001 |
| s(Depth, m)                                              |    |                |         | 7.796 | 23.043  |          |
| ODBA ~ Phase + s(Time of Day) + s(Water Temperature, °C) |    |                |         |       |         |          |
| Phase                                                    | 2  |                |         |       | 555.6   | < 0.0001 |
| Intercept                                                |    | -1.738 ± 0.069 | -25.202 |       |         | < 0.0001 |
| Descent                                                  |    | 0.180 ± 0.006  | 29.480  |       |         | < 0.0001 |
| Level                                                    |    | -0.033 ± 0.005 | -6.308  |       |         | < 0.0001 |
| s(Time of Day)                                           |    |                |         | 7.138 | 17.86   | < 0.0001 |
| s(Water Temperature, °C)                                 |    |                |         | 8.738 | 37.82   | < 0.0001 |

df, degrees of freedom; SE, standard error; edf, estimated degrees of freedom
