# Supplementary material for: Diel patterns in swimming behavior of a vertically migrating deepwater shark, the bluntnose sixgill (Hexanchus griseus)
Source: PubMed Central journal article supplement (PMC6980647; doi:10.1371/journal.pone.0228253), 2020-01-24
Supplement: pone.0228253.s015.pdf [file pone.0228253.s015.pdf]

**S6 Table. Ranked hidden Markov models of effects on activity states based on overall dynamic body acceleration.** Values in bold indicate the best-fit model. Phase corresponds to swimming phase (ascent, descent, level). n = 95300.

| <b>Model</b>                                                                                         | <b>logLik</b>   | <b>AIC</b>       | <b>ΔAIC</b> | <b>w</b>                 |
|------------------------------------------------------------------------------------------------------|-----------------|------------------|-------------|--------------------------|
| <b>ID, Phase, Time of Day, % Oxygen Saturation, Time of Day × % Oxygen Saturation</b>                | <b>233964.0</b> | <b>-467874.0</b> | <b>0.0</b>  | <b>0.843</b>             |
| ID, Phase, Time of Day, PC1, Time of Day × PC1                                                       | 233962.3        | -467870.6        | 3.4         | 0.157                    |
| ID, Phase, Time of Day, Intramuscular Temperature (°C), Time of Day × Intramuscular Temperature (°C) | 233951.1        | -467848.1        | 25.9        | 2.05 × 10 <sup>-6</sup>  |
| ID, Phase, Time of Day, Water Temperature (°C), Time of Day × Water Temperature (°C)                 | 233940.7        | -467827.3        | 46.7        | 6.33 × 10 <sup>-11</sup> |
| ID, Time of Day, % Oxygen Saturation, Time of Day × % Oxygen Saturation                              | 233919.3        | -467792.6        | 81.4        | 1.77 × 10 <sup>-18</sup> |
| ID, Time of Day, PC1, Time of Day × PC1                                                              | 233910.2        | -467774.5        | 99.5        | 2.09 × 10 <sup>-22</sup> |
| ID, Phase, Time of Day, Depth (m), Time of Day × Depth (m)                                           | 233912.9        | -467771.9        | 102.1       | 5.78 × 10 <sup>-23</sup> |
| ID, Time of Day, Water Temperature (°C), Time of Day × Water Temperature (°C)                        | 233891.6        | -467737.2        | 136.8       | 1.66 × 10 <sup>-30</sup> |
| ID, Time of Day, Intramuscular Temperature (°C), Time of Day × Intramuscular Temperature (°C)        | 233888.6        | -467731.1        | 142.9       | 8.17 × 10 <sup>-32</sup> |
| ID, Time of Day, Depth (m), Time of Day × Depth (m)                                                  | 233876.2        | -467706.3        | 167.7       | 3.33 × 10 <sup>-37</sup> |
| ID, Phase, Time of Day, Depth (m)                                                                    | 233848.8        | -467651.6        | 222.4       | 4.26 × 10 <sup>-49</sup> |
| ID, Phase, Time of Day, PC1                                                                          | 233846.5        | -467646.9        | 227.1       | 4.21 × 10 <sup>-50</sup> |
| ID, Phase, Time of Day, Intramuscular Temperature (°C)                                               | 233846.0        | -467646.0        | 228.0       | 2.64 × 10 <sup>-50</sup> |
| ID, Phase, Time of Day, Water Temperature (°C)                                                       | 233842.6        | -467639.3        | 234.7       | 9.21 × 10 <sup>-52</sup> |
| Phase, Time of Day, Intramuscular Temperature (°C), Time of Day × Intramuscular Temperature (°C)     | 233840.7        | -467639.3        | 234.7       | 9.47 × 10 <sup>-52</sup> |
| ID, Phase, Time of Day, % Oxygen Saturation                                                          | 233838.3        | -467630.6        | 243.4       | 1.17 × 10 <sup>-53</sup> |
| ID, Phase, Time of Day                                                                               | 233821.6        | -467601.1        | 272.9       | 4.73 × 10 <sup>-60</sup> |
| Phase, Time of Day, PC1, Time of Day × PC1                                                           | 233817.4        | -467592.7        | 281.3       | 7.08 × 10 <sup>-62</sup> |
| Phase, Time of Day, % Oxygen Saturation, Time of Day × % Oxygen Saturation                           | 233816.2        | -467590.4        | 283.6       | 2.29 × 10 <sup>-62</sup> |
| ID, Time of Day, Depth (m)                                                                           | 233800.4        | -467562.8        | 311.2       | 2.32 × 10 <sup>-68</sup> |
| ID, Time of Day, Intramuscular Temperature (°C)                                                      | 233797.4        | -467556.8        | 317.2       | 1.16 × 10 <sup>-69</sup> |
| ID, Time of Day, PC1                                                                                 | 233795.9        | -467553.8        | 320.2       | 2.49 × 10 <sup>-70</sup> |
| ID, Time of Day, Water Temperature (°C)                                                              | 233794.1        | -467550.2        | 323.8       | 4.09 × 10 <sup>-71</sup> |
| ID, Time of Day, % Oxygen Saturation                                                                 | 233793.6        | -467549.3        | 324.7       | 2.63 × 10 <sup>-71</sup> |
| ID, Time of Day                                                                                      | 233785.1        | -467536.2        | 337.8       | 3.80 × 10 <sup>-74</sup> |
| ID, Depth (m)                                                                                        | 233781.4        | -467532.8        | 341.2       | 6.99 × 10 <sup>-75</sup> |

| Model                                                                                            | logLik   | AIC       | $\Delta$ AIC | w                       |
|--------------------------------------------------------------------------------------------------|----------|-----------|--------------|-------------------------|
| ID, PC1                                                                                          | 233777.2 | -467524.4 | 349.6        | $1.02 \times 10^{-76}$  |
| Phase, Time of Day, Water Temperature (°C), Time of Day $\times$ Water Temperature (°C)          | 233783.1 | -467524.1 | 349.9        | $9.09 \times 10^{-77}$  |
| ID, % Oxygen Saturation                                                                          | 233771.4 | -467512.8 | 361.2        | $3.18 \times 10^{-79}$  |
| ID, Intramuscular Temperature (°C)                                                               | 233771.2 | -467512.4 | 361.6        | $2.57 \times 10^{-79}$  |
| ID, Water Temperature (°C)                                                                       | 233766.3 | -467502.6 | 371.4        | $1.90 \times 10^{-81}$  |
| Time of Day, % Oxygen Saturation, Time of Day $\times$ % Oxygen Saturation                       | 233740.9 | -467447.8 | 426.2        | $2.46 \times 10^{-93}$  |
| Phase, Time of Day, Depth (m), Time of Day $\times$ Depth (m)                                    | 233744.4 | -467446.7 | 427.3        | $1.43 \times 10^{-93}$  |
| ID, Phase                                                                                        | 233738.7 | -467443.4 | 430.6        | $2.69 \times 10^{-94}$  |
| Time of Day, Intramuscular Temperature (°C), Time of Day $\times$ Intramuscular Temperature (°C) | 233735.4 | -467436.8 | 437.2        | $9.77 \times 10^{-96}$  |
| Phase, Time of Day, % Oxygen Saturation                                                          | 233734.1 | -467434.3 | 439.7        | $2.78 \times 10^{-96}$  |
| Phase, Time of Day, PC1                                                                          | 233732.5 | -467431.0 | 443.0        | $5.59 \times 10^{-97}$  |
| Phase, Time of Day, Intramuscular Temperature (°C)                                               | 233732.1 | -467430.2 | 443.8        | $3.74 \times 10^{-97}$  |
| Time of Day, PC1, Time of Day $\times$ PC1                                                       | 233730.3 | -467426.7 | 447.3        | $6.32 \times 10^{-98}$  |
| ID                                                                                               | 233711.6 | -467397.2 | 476.8        | $2.53 \times 10^{-104}$ |
| Phase, Time of Day, Water Temperature (°C)                                                       | 233714.0 | -467394.1 | 479.9        | $5.28 \times 10^{-105}$ |
| Phase, Time of Day, Depth (m)                                                                    | 233703.1 | -467372.1 | 501.9        | $9.05 \times 10^{-110}$ |
| Time of Day, Water Temperature (°C), Time of Day $\times$ Water Temperature (°C)                 | 233702.4 | -467370.8 | 503.2        | $4.50 \times 10^{-110}$ |
| Time of Day, Depth (m), Time of Day $\times$ Depth (m)                                           | 233678.4 | -467322.9 | 551.1        | $1.82 \times 10^{-120}$ |
| Phase, Time of Day                                                                               | 233669.7 | -467309.5 | 564.5        | $2.25 \times 10^{-123}$ |
| Time of Day, % Oxygen Saturation                                                                 | 233664.7 | -467303.4 | 570.6        | $1.08 \times 10^{-124}$ |
| % Oxygen Saturation                                                                              | 233650.5 | -467283.0 | 591.0        | $3.93 \times 10^{-129}$ |
| Time of Day, PC1                                                                                 | 233653.5 | -467281.0 | 593.0        | $1.48 \times 10^{-129}$ |
| Intramuscular Temperature (°C)                                                                   | 233647.7 | -467277.3 | 596.7        | $2.32 \times 10^{-130}$ |
| Time of Day, Intramuscular Temperature (°C)                                                      | 233648.3 | -467270.5 | 603.5        | $7.74 \times 10^{-132}$ |
| PC1                                                                                              | 233644.2 | -467270.3 | 603.7        | $7.05 \times 10^{-132}$ |
| Time of Day, Water Temperature (°C)                                                              | 233639.8 | -467253.6 | 620.4        | $1.65 \times 10^{-135}$ |
| Time of Day, Depth (m)                                                                           | 233638.6 | -467251.3 | 622.7        | $5.15 \times 10^{-136}$ |
| Water Temperature (°C)                                                                           | 233627.4 | -467236.7 | 637.3        | $3.54 \times 10^{-139}$ |
| Depth (m)                                                                                        | 233625.8 | -467233.7 | 640.3        | $7.69 \times 10^{-140}$ |
| Time of Day                                                                                      | 233619.6 | -467217.3 | 656.7        | $2.14 \times 10^{-143}$ |

| <b>Model</b>  | <b>logLik</b> | <b>AIC</b> | <b><math>\Delta</math>AIC</b> | <b>w</b>                |
|---------------|---------------|------------|-------------------------------|-------------------------|
| Phase         | 233578.8      | -467135.6  | 738.4                         | $3.90 \times 10^{-161}$ |
| No covariates | 233544.2      | -467074.4  | 799.6                         | $2.04 \times 10^{-174}$ |

logLik, maximum log-likelihood; ID, individual shark
